# Supplementary material
Source: Research Square preprint supplement (doi:10.21203/rs.3.rs-8835634/v1)
Supplement: Supplementary file 1 [file c07bf5947bce9688b5393e65.docx]

Dear Editors:

The datasets generated during the current study are not publicly available. Because these data are part of our research project, which is currently under way. We must wait until this research project is completed before we can make all the data public. But the data in this paper are available from the corresponding author on reasonable request.

Thank you and best regards.

Yours sincerely.

Corresponding author:

Name: Ma Zhe

E-mail: MZJSEDU@163.com

Address: Xi'an University of Science and Technology, Xi'an, 710054, China
